# Supplementary material
Source: PubMed Central journal article supplement (PMC9272590)
Supplement: NIHMS980060-supplement-Supplement.pdf [file NIHMS980060-supplement-Supplement.pdf]

# Supporting Information

## Vascular Interventional Radiology Guided Photothermal Therapy of Colorectal Cancer Liver Metastasis with Theranostic Gold Nanorods

*Abdul Kareem Parchur<sup>1</sup>, Gayatri Sharma<sup>1</sup>, Jaidip M. Jagtap<sup>1</sup>, Venkateswara Rao Gogineni,<sup>2</sup>  
Peter S. LaViolette<sup>2</sup>, Michael J. Flister<sup>3</sup>, Sarah Beth White<sup>2</sup>, Amit Joshi<sup>1,2\*</sup>*

*<sup>1</sup>Department of Biomedical Engineering, <sup>2</sup>Department of Radiology, <sup>3</sup>Department of Physiology,  
Medical College of Wisconsin, Milwaukee, WI 53226, USA*

\*Corresponding Author: Dr. Amit Joshi, PhD

Phone: +1-(414) 955-7588

Fax: +1-(414) 805-8282

E-mail: [ajoshi@mcw.edu](mailto:ajoshi@mcw.edu)

**KEYWORDS:** *colorectal cancer liver metastasis, image-guided interventional therapy, laser ablation, MR contrast, x-ray contrast, gold nanorods*

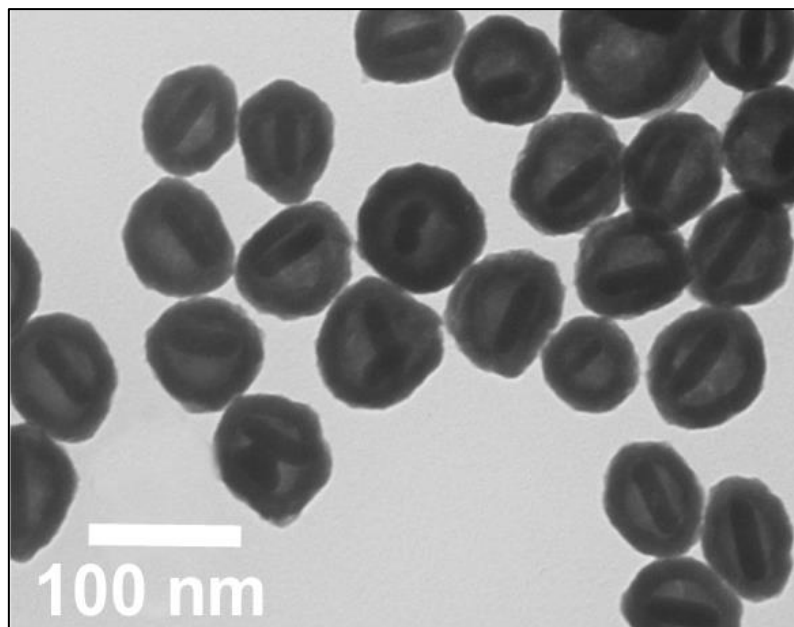

**Figure S1.** Transmission electron microscopy image of TNPs.

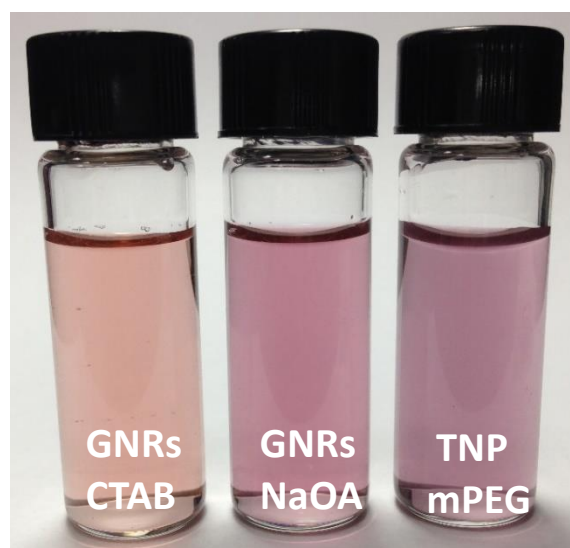

**Figure S2.** Digital photographs of aqueous solutions of GNRs-CTAB, GNRs-NaOA, and TNP-mPEG with concentration  $\sim 10^{11}$  NP/mL dispersed in water

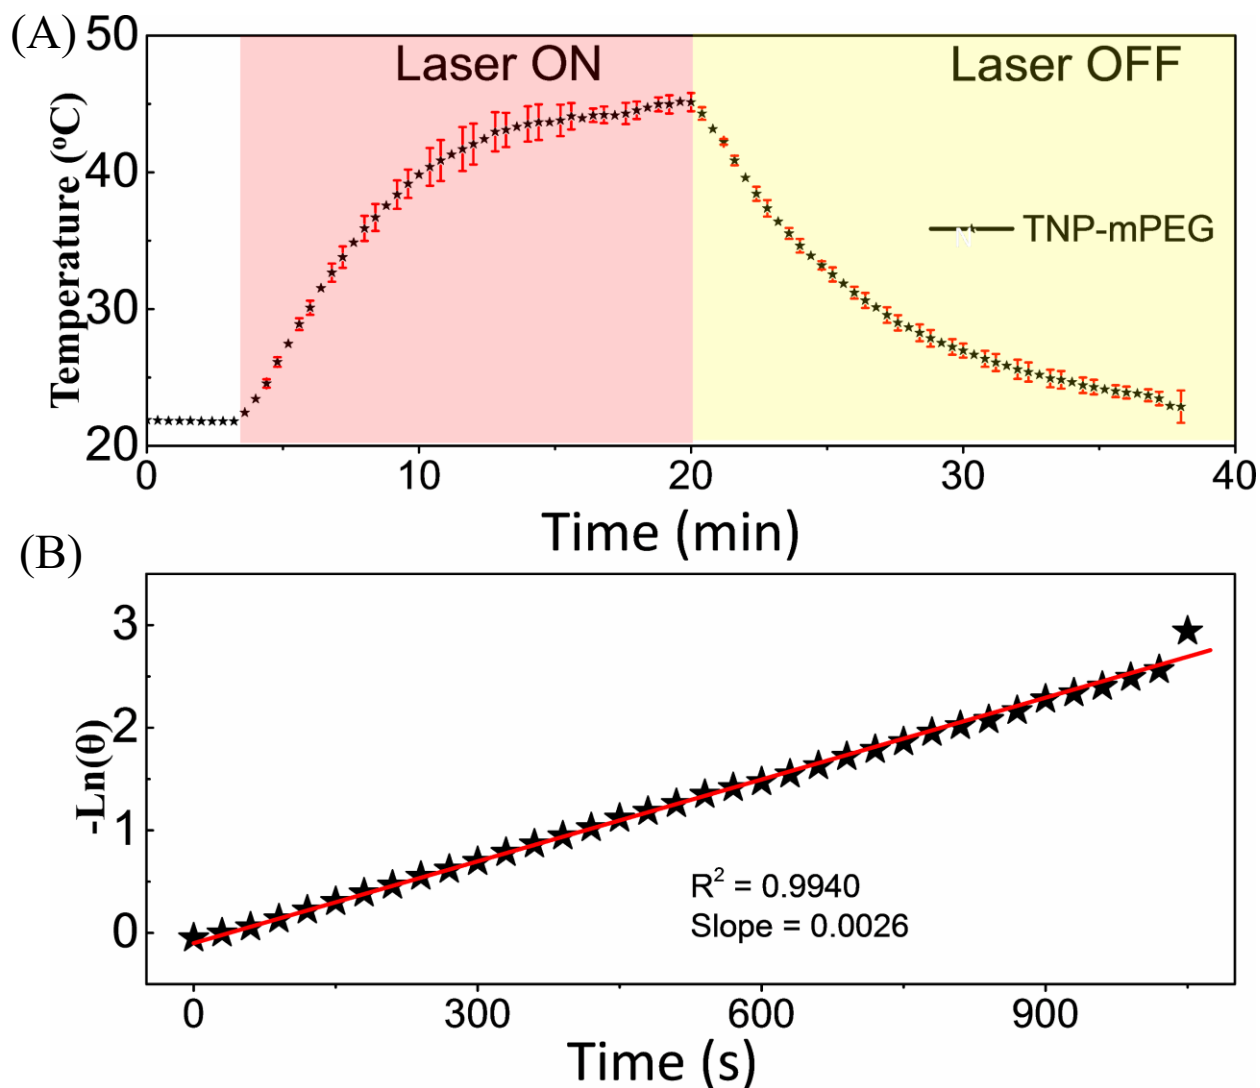

**Figure S3.** (A) Temperature kinetics of TNP-mPEG, OD=0.3, I=700 mW/cm<sup>2</sup> (n =3). (B) Natural log of [(T(t) – T<sub>0</sub>)/(T<sub>m</sub> – T<sub>0</sub>)] vs time of cooling temperature kinetics (Laser OFF).

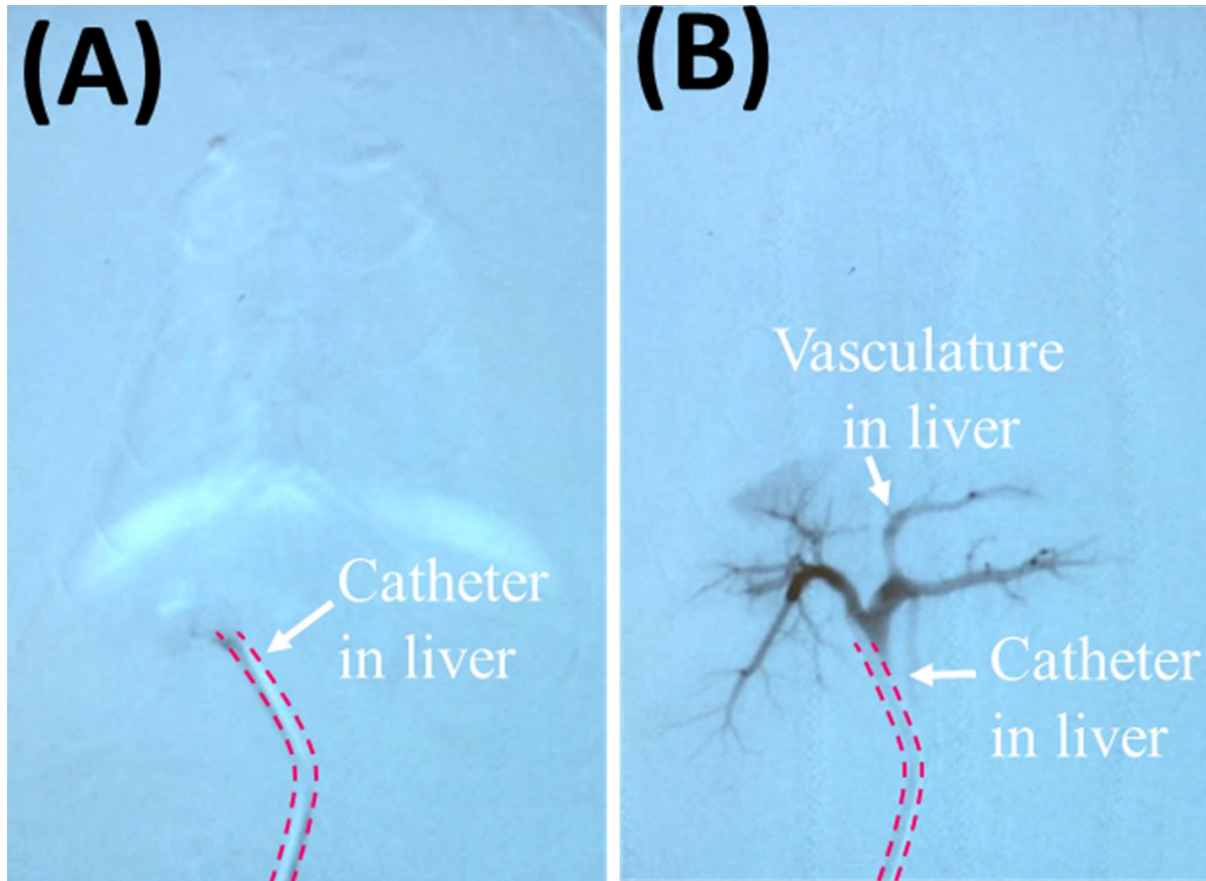

**Figure S4.** (A) Placing catheter in to liver of rat and (B) an arterial injection of 1-mL of Omnipaque in the hepatic artery to confirm the liver vessel structure and catheter placement using C-Arm (GE OEC 800, GE Healthcare, Waukesha, WI) fluoroscopic guidance and administration of TNPs.

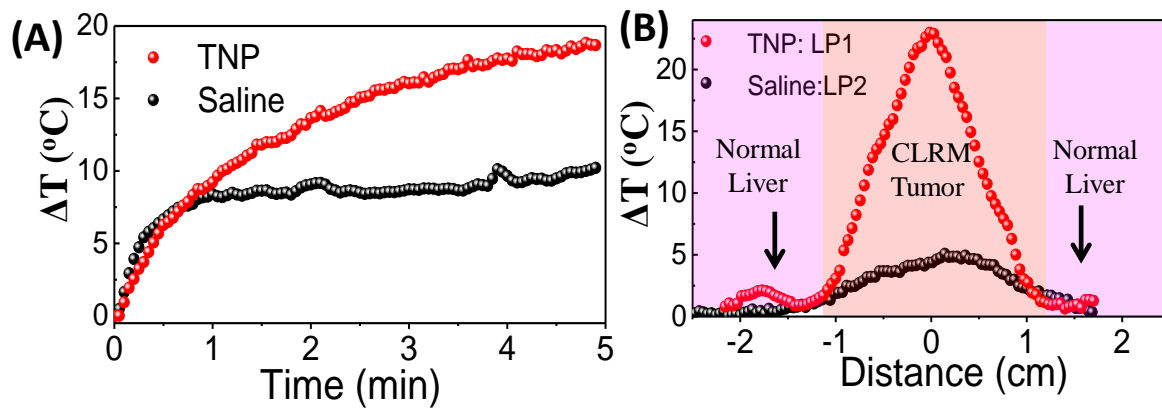

**Figure S5.** (A) Temperature kinetics of CRLM tumor at  $0.5 \text{ W/cm}^2$  NIR laser irradiations for both Saline and TNPs hepatic portal vein injection. (B) Temperature line profile across the tumor.

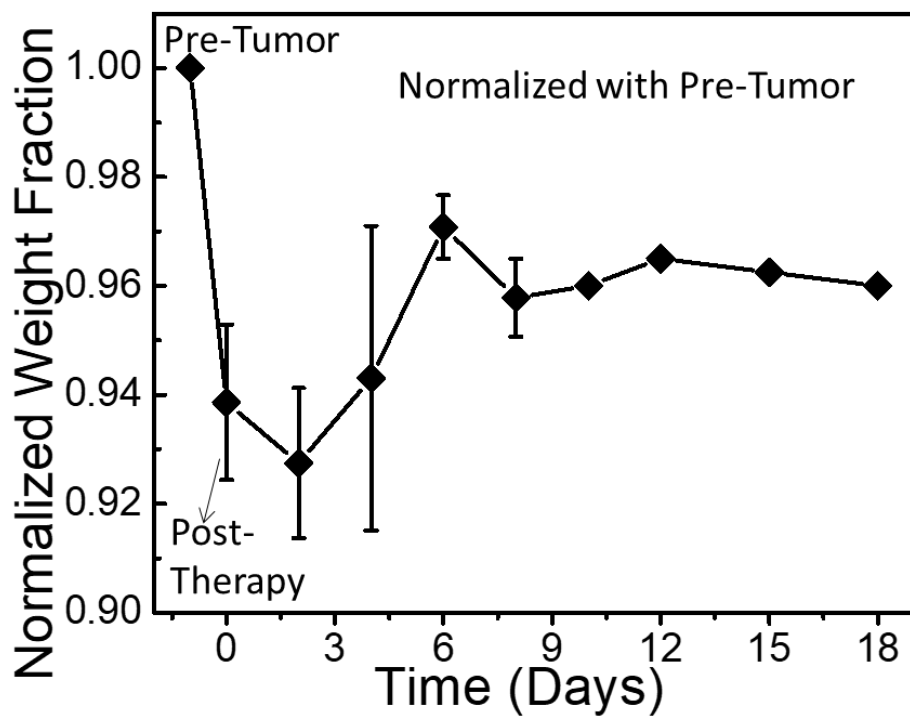

**Figure S6.** Change in weight fraction CRLM rat after therapy.

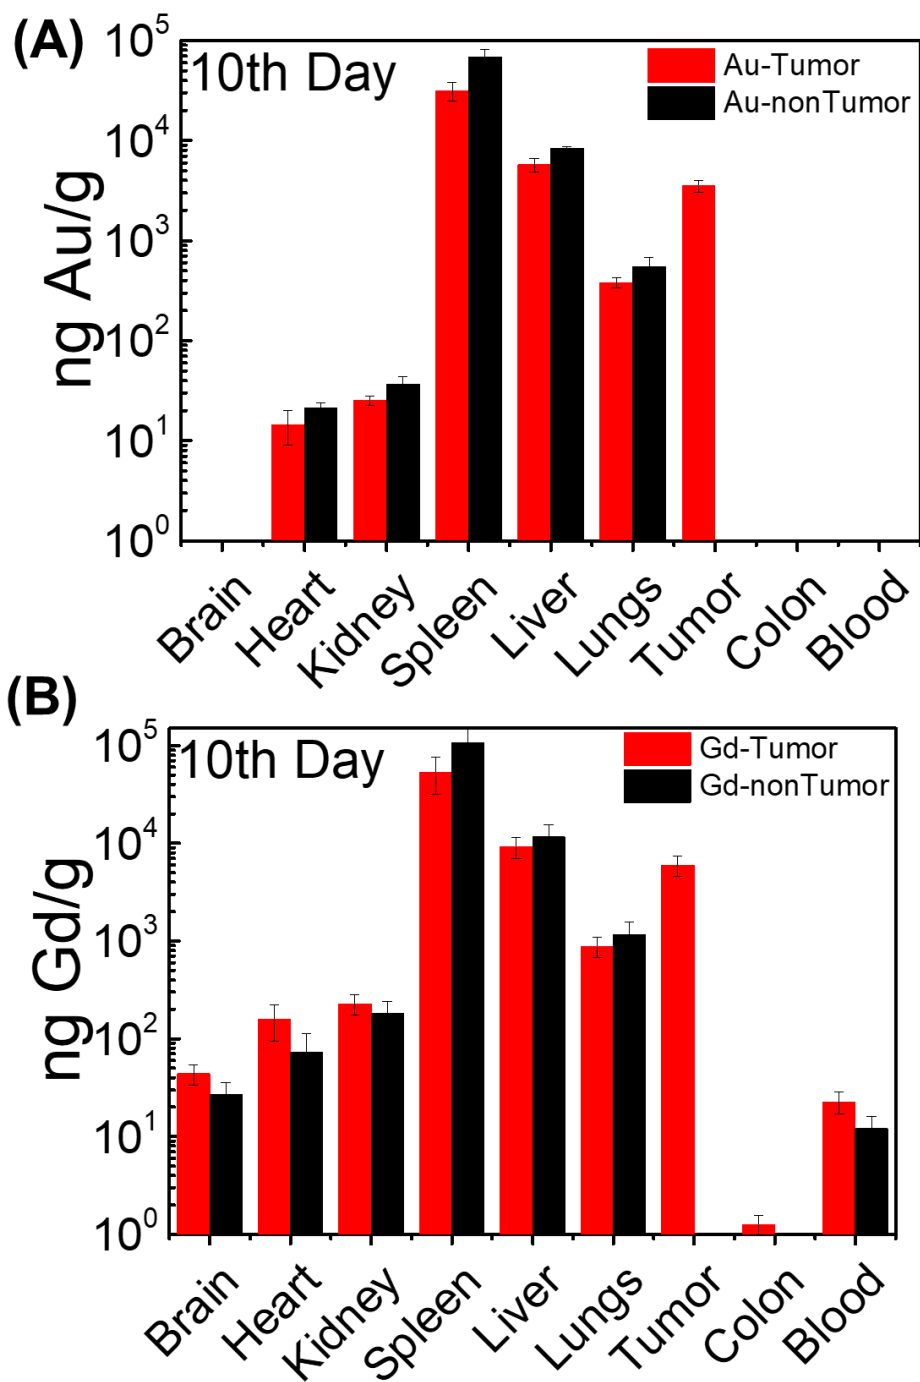

**Figure S7.** Accumulation Au/Gd in major organs of the rats at 10th Day of TNPs Post- systemic administration in both CRLM tumor (n = 6 rats/group) and non-tumor (n = 3 rats/group) bearing rats (error bars represents mean  $\pm$  SEM) on log scale.
